# Supplementary material for: Solvent-free solution processed passivation layer for improved long-term stability of organic field-effect transistors
Source: Royal Society of Chemistry journal article supplement (doi:10.1039/c0jm00898b), 2010-11-04
Supplement: c0jm00898b.pdf [file c0jm00898b.pdf]

## Supplementary Information

Low temperature and solvent-free solution-processed passivation layer for improved long-term stability of organic field-effect transistors

**Sooji Nam<sup>1</sup>, Jaeyoung Jang<sup>1</sup>, Kihyun Kim<sup>2</sup>, Won Min Yun<sup>1</sup>, Dae Sung Chung<sup>1</sup>, Oh Kwan Kwon<sup>1</sup>, Taihyun Chang<sup>2</sup> and Chan Eon Park<sup>1,\*</sup>**

<sup>1</sup>Polymer Research Institute, Department of Chemical Engineering, Pohang University of Science and Technology (POSTECH), Pohang, 790-784, Korea.

<sup>2</sup>Polymer Physical Chemistry Laboratory, Department of Chemistry, Pohang University of Science and Technology (POSTECH), Pohang, 790-784, Korea.

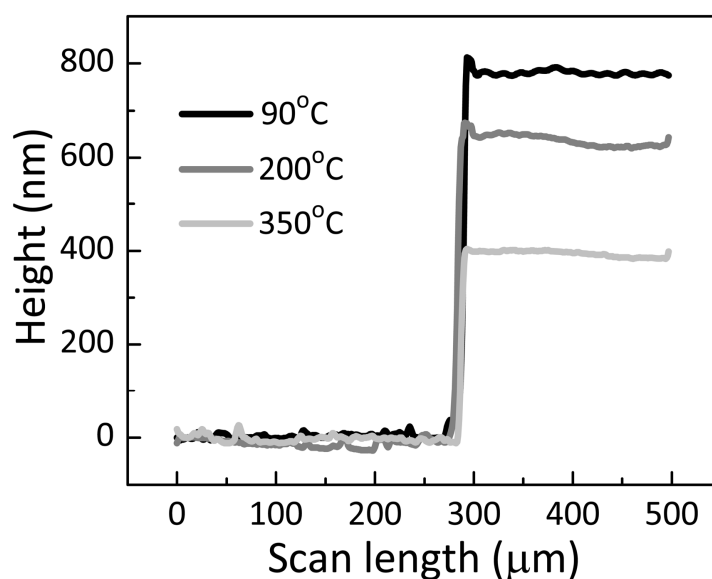

**Figure S1.** The height profiles of TGD622t films cured at 90°C, 200°C, and 350°C and corresponding thicknesses of the films were about 790, 650 and 400 nm, respectively. A surface profiler (Alpha-step<sup>®</sup> 500, KLA Tencor) was used for measuring the thickness of the films.

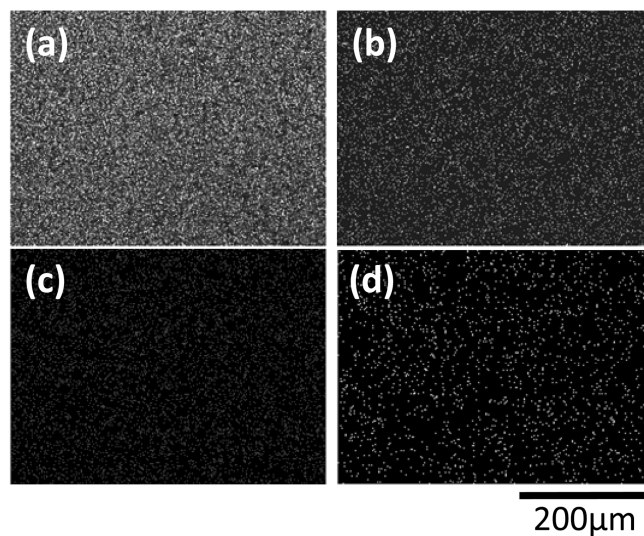

**Figure S2.** Element distribution mapping images using energy dispersive spectrometry (EDS):(a) Si, (b) O, (c) C and (d) Ti, are the molecules of comprising TGD622t (cured at 90°C). For EDS analysis, the films were identified through scanning electron microscopy (SEM, JEOL JSM-7401F). X-rays generated by the SEM's focused electron beam were collected by the EDS detector. An accelerating energy was 20 keV and number of iterations was 9.

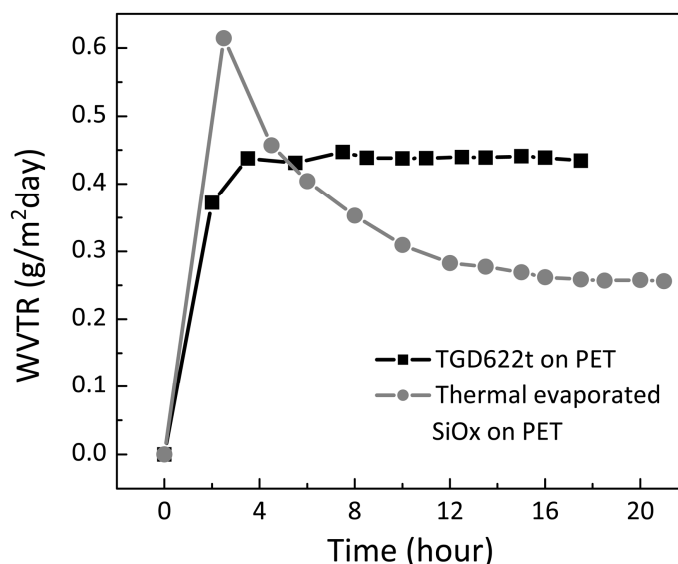

**Figure S3.** WVTR provided by TGD622t(cured at 90°C) coated PET film and thermal-evaporated SiO<sub>x</sub> coated PET film. The WVTR of TGD622t coated PET film was measured to 0.434 g/m<sup>2</sup>·day and that of thermal-evaporated SiO<sub>x</sub> was about 0.254 g/m<sup>2</sup>·day.
